# Supplementary material for: Variable coloration is associated with dampened population fluctuations in noctuid moths
Source: PubMed Central journal article supplement (PMC4455791; doi:10.1098/rspb.2014.2922), 2015-06-07
Supplement: rspb20142922supp1.pdf [file rspb20142922supp1.pdf]

**Variable coloration is associated with dampened population fluctuations in noctuid moths**

Anders Forsman, Per-Eric Betzholtz, Markus Franzén

<sup>1</sup> Author for correspondence E-mail: anders.forsman@lnu.se

**Table S1.** List of the 246 moth species for which annual abundance pattern data was collected from 2003 to 2013. Table shows taxonomy and systematics of the 246 moth species in our data set sensu Karsholt & Razowski 1996 [1] and sensu Karsholt & Stadel Nielsen 2013 [2]. Asterisks (\*) denote that the species was moved from family Noctuidae to family Erebidae by Karsholt & Stadel Nielsen 2013. Each species was classified with regard to degree of inter-individual variation in colour pattern: non-variable (0), variable (1), or highly variable (2). Each species was classified for niche breadth as belonging to one of three categories of larval host-plant specificity: monophagous species that feed only on a single plant species, oligophagous species that feed on a few plants species (use between two and five species or restricted to a particular plant genera/family), and polyphagous species that feed on six or more different plant species or genera [3]. Each species was classified as belonging to one of four classes of flight activity period: spring (Sp, March-May), summer (Su, June-August), autumn (Au, September - November) or autumn and spring (AuSp, September-April), according to Svensson [4].

| Genus and species according to Karsholt & Razowski 1996 [1] | Genus and species according to Karsholt & Stadel Nielsen 2013 [2] | Colour pattern diversity | Host plant specificity | Flight period |
|-------------------------------------------------------------|-------------------------------------------------------------------|--------------------------|------------------------|---------------|
| Abrostola tripartita                                        | Abrostola tripartita                                              | 0                        | mono                   | Su            |
| Abrostola triplasia                                         | Abrostola triplasia                                               | 0                        | mono                   | Su            |
| Acronicta aceris                                            | Acronicta aceris                                                  | 0                        | poly                   | Su            |
| Acronicta cuspis                                            | Acronicta cuspis                                                  | 0                        | poly                   | Su            |
| Acronicta megacephala                                       | Acronicta megacephala                                             | 0                        | poly                   | Su            |
| Acronicta psi                                               | Acronicta psi                                                     | 0                        | poly                   | Su            |
| Acronicta auricoma                                          | Acronicta auricoma                                                | 1                        | poly                   | Su            |
| Acronicta leporina                                          | Acronicta leporina                                                | 1                        | poly                   | Su            |
| Acronicta rumicis                                           | Acronicta rumicis                                                 | 1                        | poly                   | Su            |
| Actinotia polyodon                                          | Actinotia polyodon                                                | 0                        | mono                   | Su            |
| Aetheria bicolorata                                         | Hecatera bicolorata                                               | 2                        | oligo                  | Su            |
| Agrochola circellaris                                       | Agrochola circellaris                                             | 0                        | poly                   | Au            |
| Agrochola helvola                                           | Agrochola helvola                                                 | 0                        | poly                   | Au            |
| Agrochola litura                                            | Agrochola litura                                                  | 0                        | poly                   | Au            |
| Agrochola lota                                              | Agrochola lota                                                    | 0                        | poly                   | Au            |
| Agrochola nitida                                            | Agrochola nitida                                                  | 0                        | poly                   | Au            |
| Agrochola lychnidis                                         | Agrochola lychnidis                                               | 1                        | poly                   | Au            |
| Agrochola macilenta                                         | Agrochola macilenta                                               | 1                        | poly                   | Au            |
| Agrotis clavis                                              | Agrotis clavis                                                    | 1                        | poly                   | Su            |
| Agrotis exclamationis                                       | Agrotis exclamationis                                             | 1                        | poly                   | Su            |

|                                |                                |   |       |    |
|--------------------------------|--------------------------------|---|-------|----|
| <i>Agrotis ipsilon</i>         | <i>Agrotis ipsilon</i>         | 1 | poly  | Su |
| <i>Agrotis ripae</i>           | <i>Agrotis ripae</i>           | 1 | oligo | Su |
| <i>Agrotis vestigialis</i>     | <i>Agrotis vestigialis</i>     | 1 | poly  | Su |
| <i>Agrotis segetum</i>         | <i>Agrotis segetum</i>         | 2 | poly  | Au |
| <i>Ammonoconia caecimacula</i> | <i>Ammonoconia caecimacula</i> | 0 | poly  | Au |
| <i>Amphipoea fucosa</i>        | <i>Amphipoea fucosa</i>        | 1 | oligo | Su |
| <i>Amphipoea oculea</i>        | <i>Amphipoea oculea</i>        | 1 | oligo | Su |
| <i>Amphipyra berbera</i>       | <i>Amphipyra berbera</i>       | 0 | poly  | Su |
| <i>Amphipyra pyramidea</i>     | <i>Amphipyra pyramidea</i>     | 0 | poly  | Au |
| <i>Amphipyra tragopoginis</i>  | <i>Amphipyra tragopoginis</i>  | 0 | poly  | Au |
| <i>Anaplectoides prasina</i>   | <i>Anaplectoides prasina</i>   | 0 | poly  | Su |
| <i>Antitype chi</i>            | <i>Antitype chi</i>            | 0 | poly  | Au |
| <i>Apamea anceps</i>           | <i>Apamea anceps</i>           | 0 | oligo | Su |
| <i>Apamea furva</i>            | <i>Apamea furva</i>            | 0 | oligo | Su |
| <i>Apamea illyria</i>          | <i>Apamea illyria</i>          | 0 | oligo | Su |
| <i>Apamea lithoxylaea</i>      | <i>Apamea lithoxylaea</i>      | 0 | oligo | Su |
| <i>Apamea sordens</i>          | <i>Apamea sordens</i>          | 0 | oligo | Su |
| <i>Apamea sublustris</i>       | <i>Apamea sublustris</i>       | 0 | oligo | Su |
| <i>Apamea unanimitis</i>       | <i>Apamea unanimitis</i>       | 0 | oligo | Su |
| <i>Apamea monoglypha</i>       | <i>Apamea monoglypha</i>       | 1 | poly  | Su |
| <i>Apamea oblonga</i>          | <i>Apamea oblonga</i>          | 1 | oligo | Su |
| <i>Apamea scolopacina</i>      | <i>Apamea scolopacina</i>      | 1 | poly  | Su |
| <i>Apamea crenata</i>          | <i>Apamea crenata</i>          | 2 | oligo | Su |
| <i>Apamea ophiogramma</i>      | <i>Apamea ophiogramma</i>      | 2 | oligo | Su |
| <i>Apamea remissa</i>          | <i>Apamea remissa</i>          | 2 | oligo | Su |
| <i>Aporophyla lutulenta</i>    | <i>Aporophyla lutulenta</i>    | 2 | poly  | Au |
| <i>Archanara algae</i>         | <i>Archanara algae</i>         | 0 | oligo | Au |
| <i>Archanara sparganii</i>     | <i>Archanara sparganii</i>     | 0 | mono  | Su |
| <i>Archanara dissoluta</i>     | <i>Archanara dissoluta</i>     | 1 | mono  | Au |
| <i>Archanara geminipuncta</i>  | <i>Archanara geminipuncta</i>  | 1 | oligo | Au |
| <i>Arenostola phragmitidis</i> | <i>Arenostola phragmitidis</i> | 0 | mono  | Su |
| <i>Autographa buraetica</i>    | <i>Autographa buraetica</i>    | 0 | poly  | Su |
| <i>Autographa gamma</i>        | <i>Autographa gamma</i>        | 0 | poly  | Su |
| <i>Autographa jota</i>         | <i>Autographa jota</i>         | 0 | poly  | Su |
| <i>Autographa mandarina</i>    | <i>Autographa mandarina</i>    | 0 | poly  | Su |
| <i>Autographa pulchrina</i>    | <i>Autographa pulchrina</i>    | 0 | poly  | Su |
| <i>Axylia putris</i>           | <i>Axylia putris</i>           | 0 | poly  | Su |
| <i>Blepharita satura</i>       | <i>Mniotype satura</i>         | 0 | poly  | Au |
| <i>Caradrina morpheus</i>      | <i>Caradrina morpheus</i>      | 1 | poly  | Su |
| <i>Catocala nupta</i>          | * <i>Catocala nupta</i>        | 0 | poly  | Au |
| <i>Catocala promissa</i>       | * <i>Catocala promissa</i>     | 0 | poly  | Au |
| <i>Catocala fraxini</i>        | * <i>Catocala fraxini</i>      | 1 | mono  | Su |
| <i>Celaena leucostigma</i>     | <i>Celaena leucostigma</i>     | 2 | poly  | Su |
| <i>Cerapteryx graminis</i>     | <i>Cerapteryx graminis</i>     | 0 | oligo | Su |
| <i>Cerastis leucographa</i>    | <i>Cerastis leucographa</i>    | 0 | poly  | Sp |
| <i>Cerastis rubricosa</i>      | <i>Cerastis rubricosa</i>      | 0 | poly  | Sp |
| <i>Charanyca trigammica</i>    | <i>Charanyca trigammica</i>    | 0 | poly  | Su |
| <i>Chersotis cuprea</i>        | <i>Chersotis cuprea</i>        | 0 | poly  | Au |

|                                |                                 |   |       |      |
|--------------------------------|---------------------------------|---|-------|------|
| <i>Chilodes maritima</i>       | <i>Chilodes maritima</i>        | 2 | oligo | Su   |
| <i>Chortodes brevilinea</i>    | <i>Protarchanara brevilinea</i> | 0 | mono  | Su   |
| <i>Chortodes elymi</i>         | <i>Chortodes elymi</i>          | 0 | mono  | Su   |
| <i>Chortodes extrema</i>       | <i>Chortodes extrema</i>        | 0 | mono  | Su   |
| <i>Chortodes fluxa</i>         | <i>Chortodes fluxa</i>          | 1 | mono  | Su   |
| <i>Chortodes pygmina</i>       | <i>Sedina pygmina</i>           | 1 | poly  | Au   |
| <i>Colocasia coryli</i>        | <i>Colocasia coryli</i>         | 1 | poly  | Su   |
| <i>Conistra rubiginosa</i>     | <i>Conistra rubiginosa</i>      | 0 | oligo | SpAu |
| <i>Conistra erythrocephala</i> | <i>Conistra erythrocephala</i>  | 2 | poly  | SpAu |
| <i>Conistra vaccinii</i>       | <i>Conistra vaccinii</i>        | 2 | poly  | SpAu |
| <i>Cosmia pyralina</i>         | <i>Cosmia pyralina</i>          | 0 | poly  | Su   |
| <i>Cosmia trapezina</i>        | <i>Cosmia trapezina</i>         | 2 | poly  | Su   |
| <i>Craniophora ligustri</i>    | <i>Craniophora ligustri</i>     | 1 | oligo | Su   |
| <i>Cryphia raptricula</i>      | <i>Cryphia raptricula</i>       | 1 | oligo | Su   |
| <i>Cucullia absinthii</i>      | <i>Cucullia absinthii</i>       | 0 | oligo | Su   |
| <i>Cucullia chamomillae</i>    | <i>Cucullia chamomillae</i>     | 0 | oligo | Sp   |
| <i>Cucullia fraudatrix</i>     | <i>Cucullia fraudatrix</i>      | 0 | mono  | Su   |
| <i>Cucullia praecana</i>       | <i>Cucullia praecana</i>        | 0 | oligo | Su   |
| <i>Cucullia umbratica</i>      | <i>Cucullia umbratica</i>       | 0 | oligo | Su   |
| <i>Dasypolia templi</i>        | <i>Dasypolia templi</i>         | 0 | poly  | SpAu |
| <i>Deltote bankiana</i>        | <i>Deltote bankiana</i>         | 0 | oligo | Su   |
| <i>Deltote uncula</i>          | <i>Deltote uncula</i>           | 0 | oligo | Su   |
| <i>Diachrysia chrysitis</i>    | <i>Diachrysia chrysitis</i>     | 0 | poly  | Su   |
| <i>Diachrysia tutti</i>        | <i>Diachrysia tutti</i>         | 0 | poly  | Su   |
| <i>Diarsia brunnea</i>         | <i>Diarsia brunnea</i>          | 0 | poly  | Su   |
| <i>Diarsia florida</i>         | <i>Diarsia florida</i>          | 0 | poly  | Au   |
| <i>Diarsia dahlii</i>          | <i>Diarsia dahlii</i>           | 1 | poly  | Su   |
| <i>Diarsia rubi</i>            | <i>Diarsia rubi</i>             | 1 | poly  | Sp   |
| <i>Diarsia mendica</i>         | <i>Diarsia mendica</i>          | 2 | poly  | Su   |
| <i>Dichonia aprilina</i>       | <i>Dichonia aprilina</i>        | 0 | oligo | Au   |
| <i>Discestra trifolii</i>      | <i>Discestra trifolii</i>       | 1 | poly  | Su   |
| <i>Dypterygia scabriuscula</i> | <i>Dypterygia scabriuscula</i>  | 0 | oligo | Su   |
| <i>Emmelia trabealis</i>       | <i>Emmelia trabealis</i>        | 0 | mono  | Su   |
| <i>Enargia paleacea</i>        | <i>Enargia paleacea</i>         | 0 | poly  | Su   |
| <i>Eremobia ochroleuca</i>     | <i>Eremobia ochroleuca</i>      | 0 | oligo | Su   |
| <i>Eucarta virgo</i>           | <i>Eucarta virgo</i>            | 0 | poly  | Su   |
| <i>Eugnorisma depuncta</i>     | <i>Eugnorisma depunctum</i>     | 0 | poly  | Su   |
| <i>Euplexia lucipara</i>       | <i>Euplexia lucipara</i>        | 0 | poly  | Su   |
| <i>Eupsilia transversa</i>     | <i>Eupsilia transversa</i>      | 1 | poly  | SpAu |
| <i>Eurois occulta</i>          | <i>Eurois occulta</i>           | 1 | poly  | Su   |
| <i>Euxoa nigricans</i>         | <i>Euxoa nigricans</i>          | 0 | poly  | Su   |
| <i>Euxoa nigrofusca</i>        | <i>Euxoa nigrofusca</i>         | 0 | poly  | Su   |
| <i>Euxoa obelisca</i>          | <i>Euxoa obelisca</i>           | 0 | poly  | Su   |
| <i>Euxoa recussa</i>           | <i>Euxoa recussa</i>            | 1 | poly  | Su   |
| <i>Euxoa tritici</i>           | <i>Euxoa tritici</i>            | 1 | poly  | Su   |
| <i>Euxoa cursoria</i>          | <i>Euxoa cursoria</i>           | 2 | poly  | Su   |
| <i>Gortyna flavago</i>         | <i>Gortyna flavago</i>          | 0 | poly  | Au   |
| <i>Graphiphora augur</i>       | <i>Graphiphora augur</i>        | 0 | poly  | Su   |

|                        |                         |   |       |      |
|------------------------|-------------------------|---|-------|------|
| Hada plebeja           | Hada plebeja            | 1 | poly  | Su   |
| Hadena bicurris        | Hadena bicurris         | 0 | oligo | Su   |
| Hadena compta          | Hadena compta           | 0 | oligo | Su   |
| Hadena confusa         | Hadena confusa          | 0 | oligo | Su   |
| Hadena perplexa        | Hadena perplexa         | 0 | oligo | Su   |
| Hadena rivularis       | Sideridis rivularis     | 0 | oligo | Su   |
| Helicoverpa armigera   | Helicoverpa armigera    | 0 | poly  | Su   |
| Heliophobus reticulata | Heliophobus reticulata  | 0 | poly  | Su   |
| Heliiothis maritima    | Heliiothis maritima     | 0 | oligo | Su   |
| Heliiothis viriplaca   | Heliiothis viriplaca    | 0 | poly  | Su   |
| Herminia grisealis     | *Herminia grisealis     | 0 | poly  | Su   |
| Hoplodrina ambigua     | Hoplodrina ambigua      | 0 | oligo | Au   |
| Hoplodrina blanda      | Hoplodrina blanda       | 0 | poly  | Su   |
| Hoplodrina octogenaria | Hoplodrina octogenaria  | 0 | poly  | Su   |
| Hydraecia petasitis    | Hydraecia petasitis     | 0 | poly  | Su   |
| Hydraecia ultima       | Hydraecia ultima        | 0 | mono  | Au   |
| Hydraecia micacea      | Hydraecia micacea       | 1 | mono  | Su   |
| Hypena proboscidalis   | *Hypena proboscidalis   | 0 | mono  | Su   |
| Hypena rostralis       | *Hypena rostralis       | 2 | mono  | SpAu |
| Ipimorpha subtusa      | Ipimorpha subtusa       | 0 | mono  | Su   |
| Lacanobia contigua     | Lacanobia contigua      | 0 | poly  | Su   |
| Lacanobia oleracea     | Lacanobia oleracea      | 0 | poly  | Su   |
| Lacanobia thalassina   | Lacanobia thalassina    | 0 | poly  | Su   |
| Lacanobia w-latinum    | Lacanobia W-latinum     | 0 | poly  | Su   |
| Lacanobia suasa        | Lacanobia suasa         | 2 | poly  | Su   |
| Lasionycta proxima     | Lasionycta proxima      | 0 | poly  | Su   |
| Laspeyria flexula      | Laspeyria flexula       | 0 | oligo | Su   |
| Lithophane furcifera   | Lithomoia furcifera     | 0 | poly  | Au   |
| Lithomoia solidaginis  | Lithophane solidaginis  | 1 | poly  | Au   |
| Luperina testacea      | Luperina testacea       | 1 | oligo | Au   |
| Lycophotia porphyrea   | Lycophotia porphyrea    | 0 | mono  | Su   |
| Lygephila pastinum     | *Lygephila pastinum     | 0 | oligo | Su   |
| Macdunnoughia confusa  | Macdunnoughia confusa   | 0 | poly  | Su   |
| Macrochilo cribrumalis | *Macrochilo cribrumalis | 0 | poly  | Su   |
| Mamestra brassicae     | Mamestra brassicae      | 1 | poly  | Su   |
| Melanchra persicariae  | Melanchra persicariae   | 1 | poly  | Su   |
| Melanchra pisi         | Melanchra pisi          | 1 | poly  | Su   |
| Mesapamea didyma       | Mesapamea secalella     | 2 | oligo | Su   |
| Mesapamea secalis      | Mesapamea secalis       | 2 | oligo | Su   |
| Mesoligia furuncula    | Mesoligia furuncula     | 1 | oligo | Su   |
| Mesoligia literosa     | Mesoligia literosa      | 1 | poly  | Su   |
| Mniotype adusta        | Mniotype adusta         | 0 | poly  | Su   |
| Moma alpium            | Moma alpium             | 0 | poly  | Su   |
| Mythimna albipuncta    | Mythimna albipuncta     | 0 | oligo | Su   |
| Mythimna comma         | Mythimna comma          | 0 | oligo | Su   |
| Mythimna conigera      | Mythimna conigera       | 0 | oligo | Su   |
| Mythimna ferrago       | Mythimna ferrago        | 0 | oligo | Su   |
| Mythimna impura        | Mythimna impura         | 0 | mono  | Sp   |

|                          |                          |   |       |      |
|--------------------------|--------------------------|---|-------|------|
| Mythimna l-album         | Mythimna l-album         | 0 | oligo | Su   |
| Mythimna obsoleta        | Mythimna obsoleta        | 0 | oligo | Su   |
| Mythimna pudorina        | Mythimna pudorina        | 0 | mono  | Su   |
| Mythimna straminea       | Mythimna straminea       | 0 | oligo | Su   |
| Mythimna flammea         | Mythimna flammea         | 1 | oligo | Su   |
| Mythimna pallens         | Mythimna pallens         | 1 | oligo | Su   |
| Naenia typica            | Naenia typica            | 0 | poly  | Su   |
| Noctua janthina          | Noctua janthina          | 0 | poly  | Su   |
| Noctua comes             | Noctua comes             | 1 | poly  | Su   |
| Noctua interjecta        | Noctua interjecta        | 1 | poly  | Su   |
| Noctua interposita       | Noctua interposita       | 1 | poly  | Su   |
| Noctua janthe            | Noctua janthe            | 1 | poly  | Su   |
| Noctua orbona            | Noctua orbona            | 1 | poly  | Su   |
| Noctua fimbriata         | Noctua fimbriata         | 2 | poly  | Su   |
| Noctua pronuba           | Noctua pronuba           | 2 | poly  | Su   |
| Nonagria typhae          | Nonagria typhae          | 2 | mono  | Au   |
| Ochropleura plecta       | Ochropleura plecta       | 0 | poly  | Su   |
| Oligia fasciuncula       | Oligia fasciuncula       | 0 | oligo | Su   |
| Oligia versicolor        | Oligia versicolor        | 0 | oligo | Su   |
| Oligia latruncula        | Oligia latruncula        | 1 | oligo | Su   |
| Oligia strigilis         | Oligia strigilis         | 1 | oligo | Su   |
| Orthosia cerasi          | Orthosia cerasi          | 0 | poly  | Sp   |
| Orthosia gracilis        | Orthosia gracilis        | 0 | poly  | Sp   |
| Orthosia opima           | Orthosia optima          | 0 | poly  | Sp   |
| Orthosia cruda           | Orthosia cruda           | 1 | poly  | Sp   |
| Orthosia populeti        | Orthosia populeti        | 1 | poly  | Sp   |
| Orthosia gothica         | Orthosia gothica         | 2 | poly  | Sp   |
| Orthosia incerta         | Orthosia incerta         | 2 | mono  | Sp   |
| Panolis flammea          | Panolis flammea          | 0 | mono  | Su   |
| Panthea coenobita        | Panthea coenobita        | 0 | oligo | Su   |
| Papestra biren           | Papestra biren           | 0 | poly  | Su   |
| Paradrina clavipalpis    | Paradrina clavipalpis    | 1 | poly  | Su   |
| Parascotia fuliginaria   | *Parascotia fuliginaria  | 0 | oligo | Su   |
| Parastichtis suspecta    | Parastichtis suspecta    | 1 | poly  | Su   |
| Parastichtis ypsilon     | Parastichtis ypsilon     | 1 | poly  | Su   |
| Pechipogo strigilata     | *Polypogon strigilata    | 0 | poly  | Su   |
| Peridroma saucia         | Peridroma saucia         | 2 | poly  | Au   |
| Phlogophora meticulosa   | Phlogophora meticulosa   | 1 | poly  | SpAu |
| Photodes minima          | Photodes minima          | 0 | oligo | Su   |
| Plusia festucae          | Plusia festucae          | 0 | oligo | Au   |
| Plusia putnami           | Plusia putnami           | 0 | oligo | Su   |
| Polia bombycina          | Polia bombycina          | 0 | poly  | Su   |
| Polia nebulosa           | Polia nebulosa           | 0 | poly  | Su   |
| Polymixis polymita       | Polymixis polymita       | 0 | poly  | Au   |
| Protodeltote pygarga     | Protodeltote pygarga     | 0 | oligo | Su   |
| Pseudeustrotia candidula | Pseudeustrotia candidula | 0 | poly  | Su   |
| Pyrrhia umbra            | Pyrrhia umbra            | 0 | poly  | Su   |
| Rhizedra lutosa          | Rhizedra lutosa          | 1 | mono  | Au   |

|                            |                               |   |       |      |
|----------------------------|-------------------------------|---|-------|------|
| Rhyacia simulans           | Rhyacia simulans              | 0 | poly  | Su   |
| Rivula sericealis          | *Rivula sericealis            | 1 | oligo | Su   |
| Rusina ferruginea          | Rusina ferruginea             | 0 | poly  | Su   |
| Schrankia costaestrigalis  | *Schrankia<br>costaestrigalis | 0 | poly  | Su   |
| Scoliopteryx libatrix      | *Scoliopteryx libatrix        | 0 | oligo | SpAu |
| Sedina buettneri           | Sedina buettneri              | 0 | mono  | Au   |
| Shargacucullia lychnitis   | Shargacucullia lychnitis      | 0 | mono  | Su   |
| Sideridis albicolon        | Sideridis reticulata          | 0 | poly  | Su   |
| Simyra albovenosa          | Simyra albovenosa             | 1 | oligo | Su   |
| Spaelotis ravidata         | Spaelotis ravidata            | 0 | poly  | Su   |
| Spodoptera exigua          | Spodoptera exigua             | 0 | poly  | Su   |
| Staurophora celsia         | Staurophora celsia            | 0 | oligo | Au   |
| Syngrapha interrogationis  | Syngrapha<br>interrogationis  | 0 | oligo | Su   |
| Thalpophila matura         | Thalpophila matura            | 1 | oligo | Su   |
| Tholera cespitis           | Tholera cespitis              | 0 | oligo | Au   |
| Tholera decimalis          | Tholera decimalis             | 0 | oligo | Au   |
| Trachea atriplicis         | Trachea atriplicis            | 0 | oligo | Su   |
| Trisateles emortualis      | *Trisateles emortualis        | 0 | poly  | Su   |
| Tyta luctuosa              | Tyta luctuosa                 | 0 | mono  | Su   |
| Xanthia togata             | Xanthia togata                | 0 | poly  | Au   |
| Xanthia gilvago            | Xanthia gilvago               | 1 | mono  | Au   |
| Xanthia icteritia          | Xanthia icteritia             | 1 | poly  | Au   |
| Xanthia ocellaris          | Xanthia ocellaris             | 1 | mono  | Au   |
| Xanthia aurago             | Xanthia aurago                | 2 | poly  | Au   |
| Xestia baja                | Xestia baja                   | 0 | poly  | Su   |
| Xestia rhomboidea          | Xestia rhomboidea             | 0 | poly  | Su   |
| Xestia sexstrigata         | Xestia sexstrigata            | 0 | poly  | Su   |
| Xestia triangulum          | Xestia triangulum             | 0 | poly  | Su   |
| Xestia c-nigrum            | Xestia c-nigrum               | 1 | poly  | Su   |
| Xestia ashworthii          | Xestia ashworthii             | 2 | poly  | Su   |
| Xestia xanthographa        | Xestia xanthographa           | 2 | poly  | Au   |
| Xylena exsoleta            | Xylena exsoleta               | 0 | poly  | SpAu |
| Xylena vetusta             | Xylena vetusta                | 0 | poly  | SpAu |
| Zanclognatha tarsipennalis | *Herminia tarsipennalis       | 0 | poly  | Su   |

## SUPPORTING REFERENCES

1. Karsholt O., Razawski J. 1996 *The Lepidoptera of Europe - a distributional checklist*. Stenstrup, Denmark, Apollo Books.
2. Karsholt O., Stadel Nielsen P. 2013 *Revideret fortegnelse over Danmarks Sommerfugle: Revised Checklist of the Lepidoptera of Denmark*. København, Lepidopterologisk Forening, København.
3. Betzholtz P.-E., Pettersson L.B., Ryrholm N., Franzén M. 2013 With that diet, you will go far: trait-based analysis reveals a link between rapid range expansion and a nitrogen-favoured diet. *Proc R Soc B* **280**. (doi:10.1098/rspb.2012.2305).
4. Svensson I. 1993 *Lepidoptera Calender*. Stockholm, Sweden, Hans Hellberg.
